# Supplementary material
Source: Springer Nature journal article supplement (https://www.springermedizin.de/resource/supplementary/12884_2012_782_MOESM5_ESM.pdf/9458186)

A

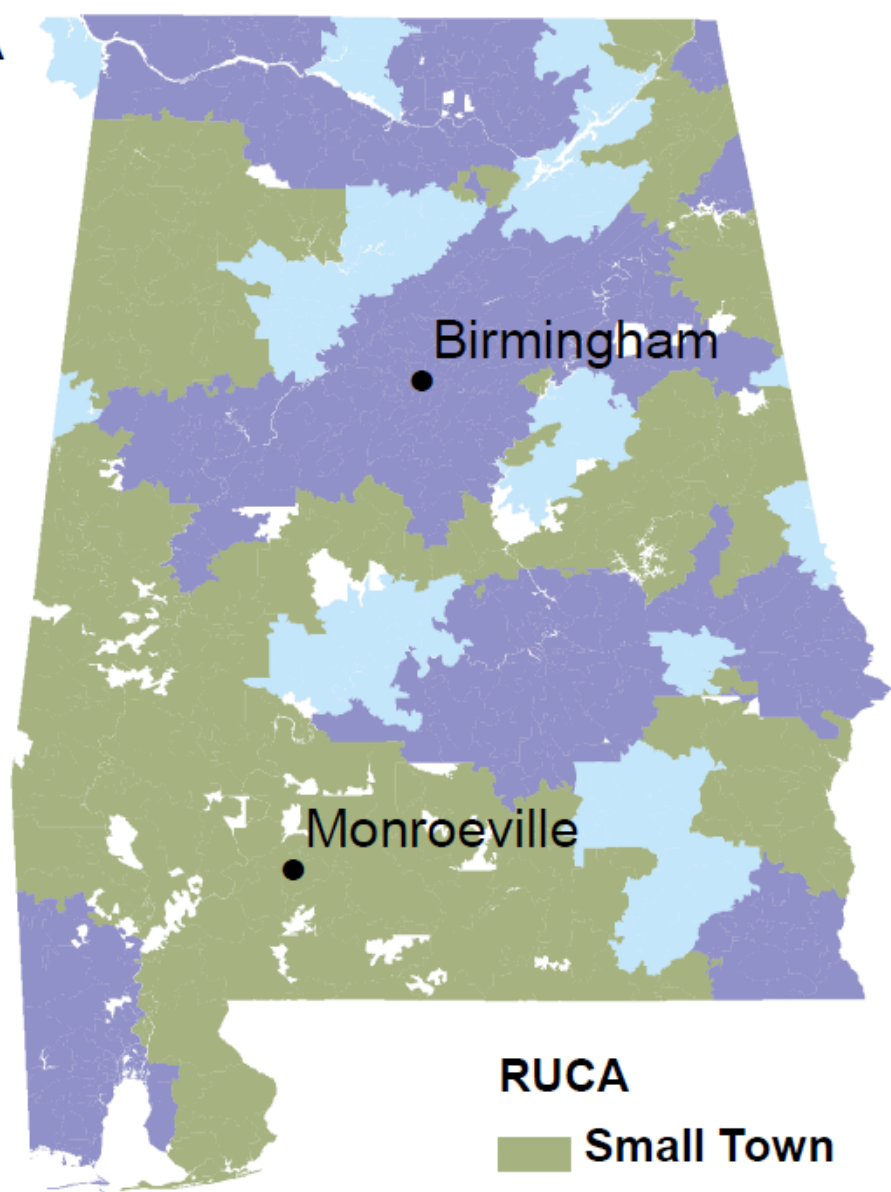

B

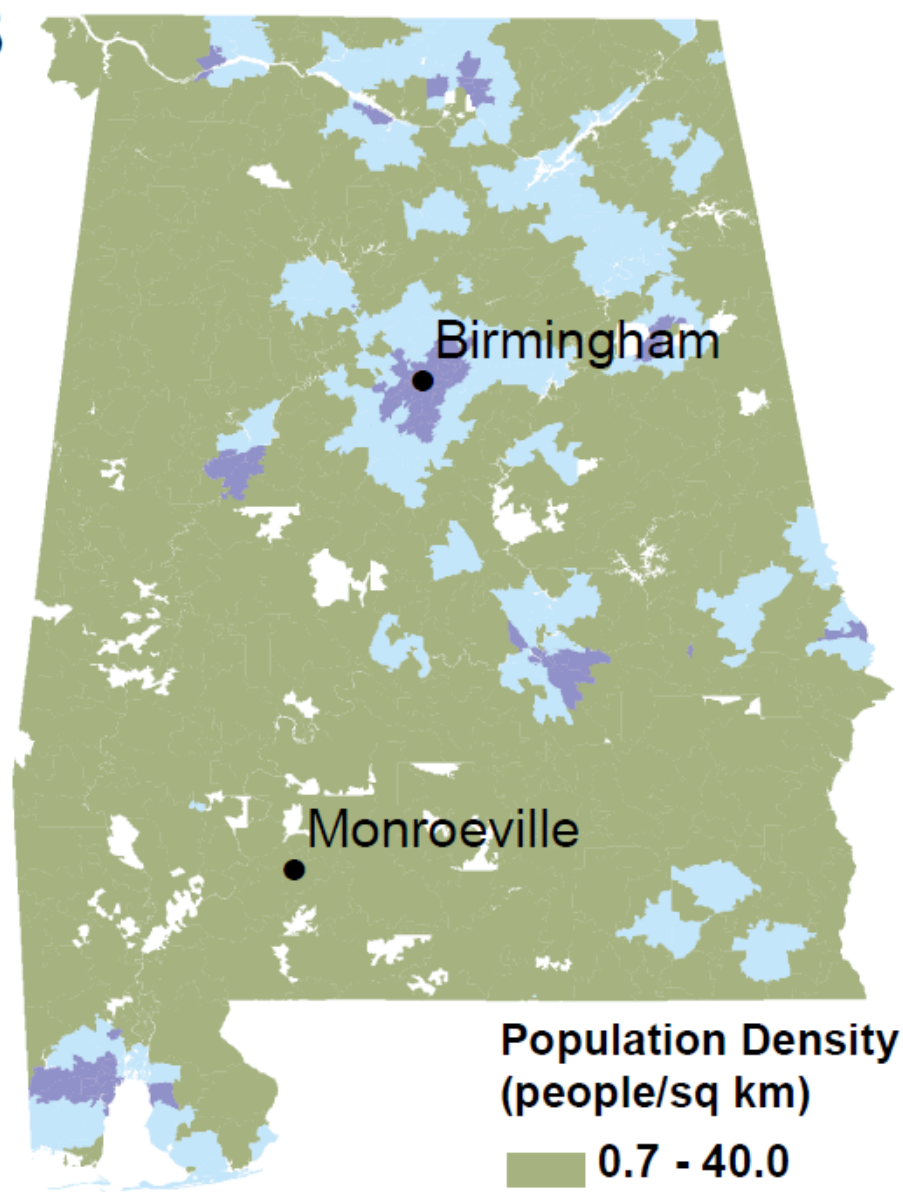

Supplement: MOESM5 [file 9458186]
